# Supplementary material
Source: PubMed Central journal article supplement (PMC6317335)

**Figure 1**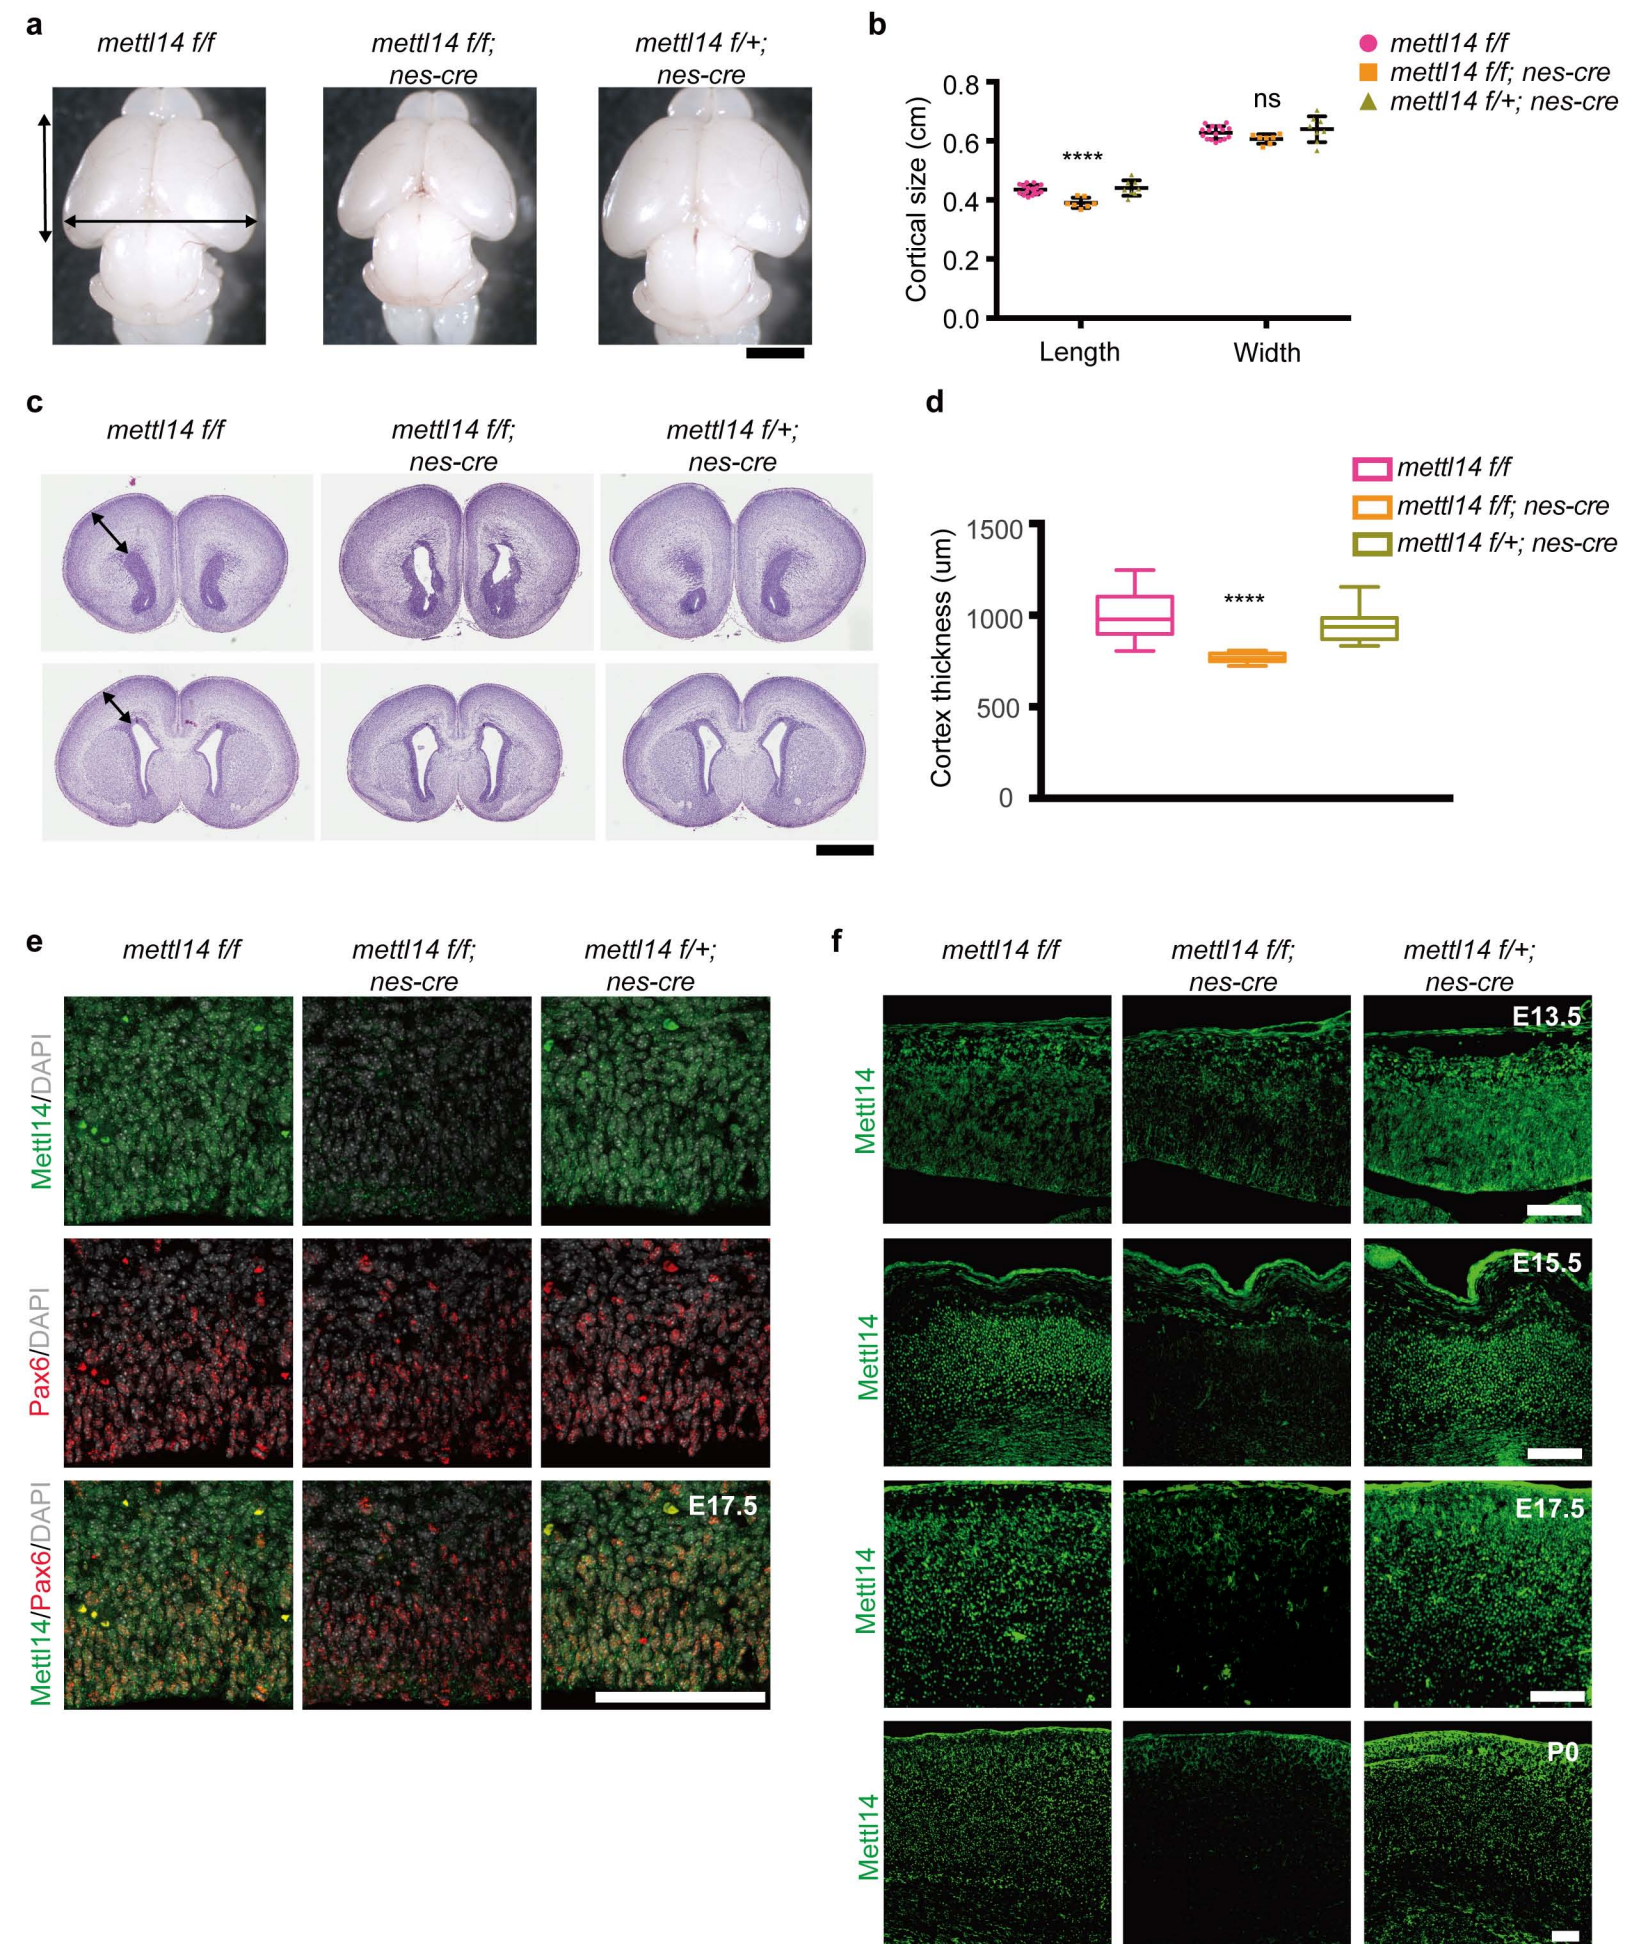

**Figure 2**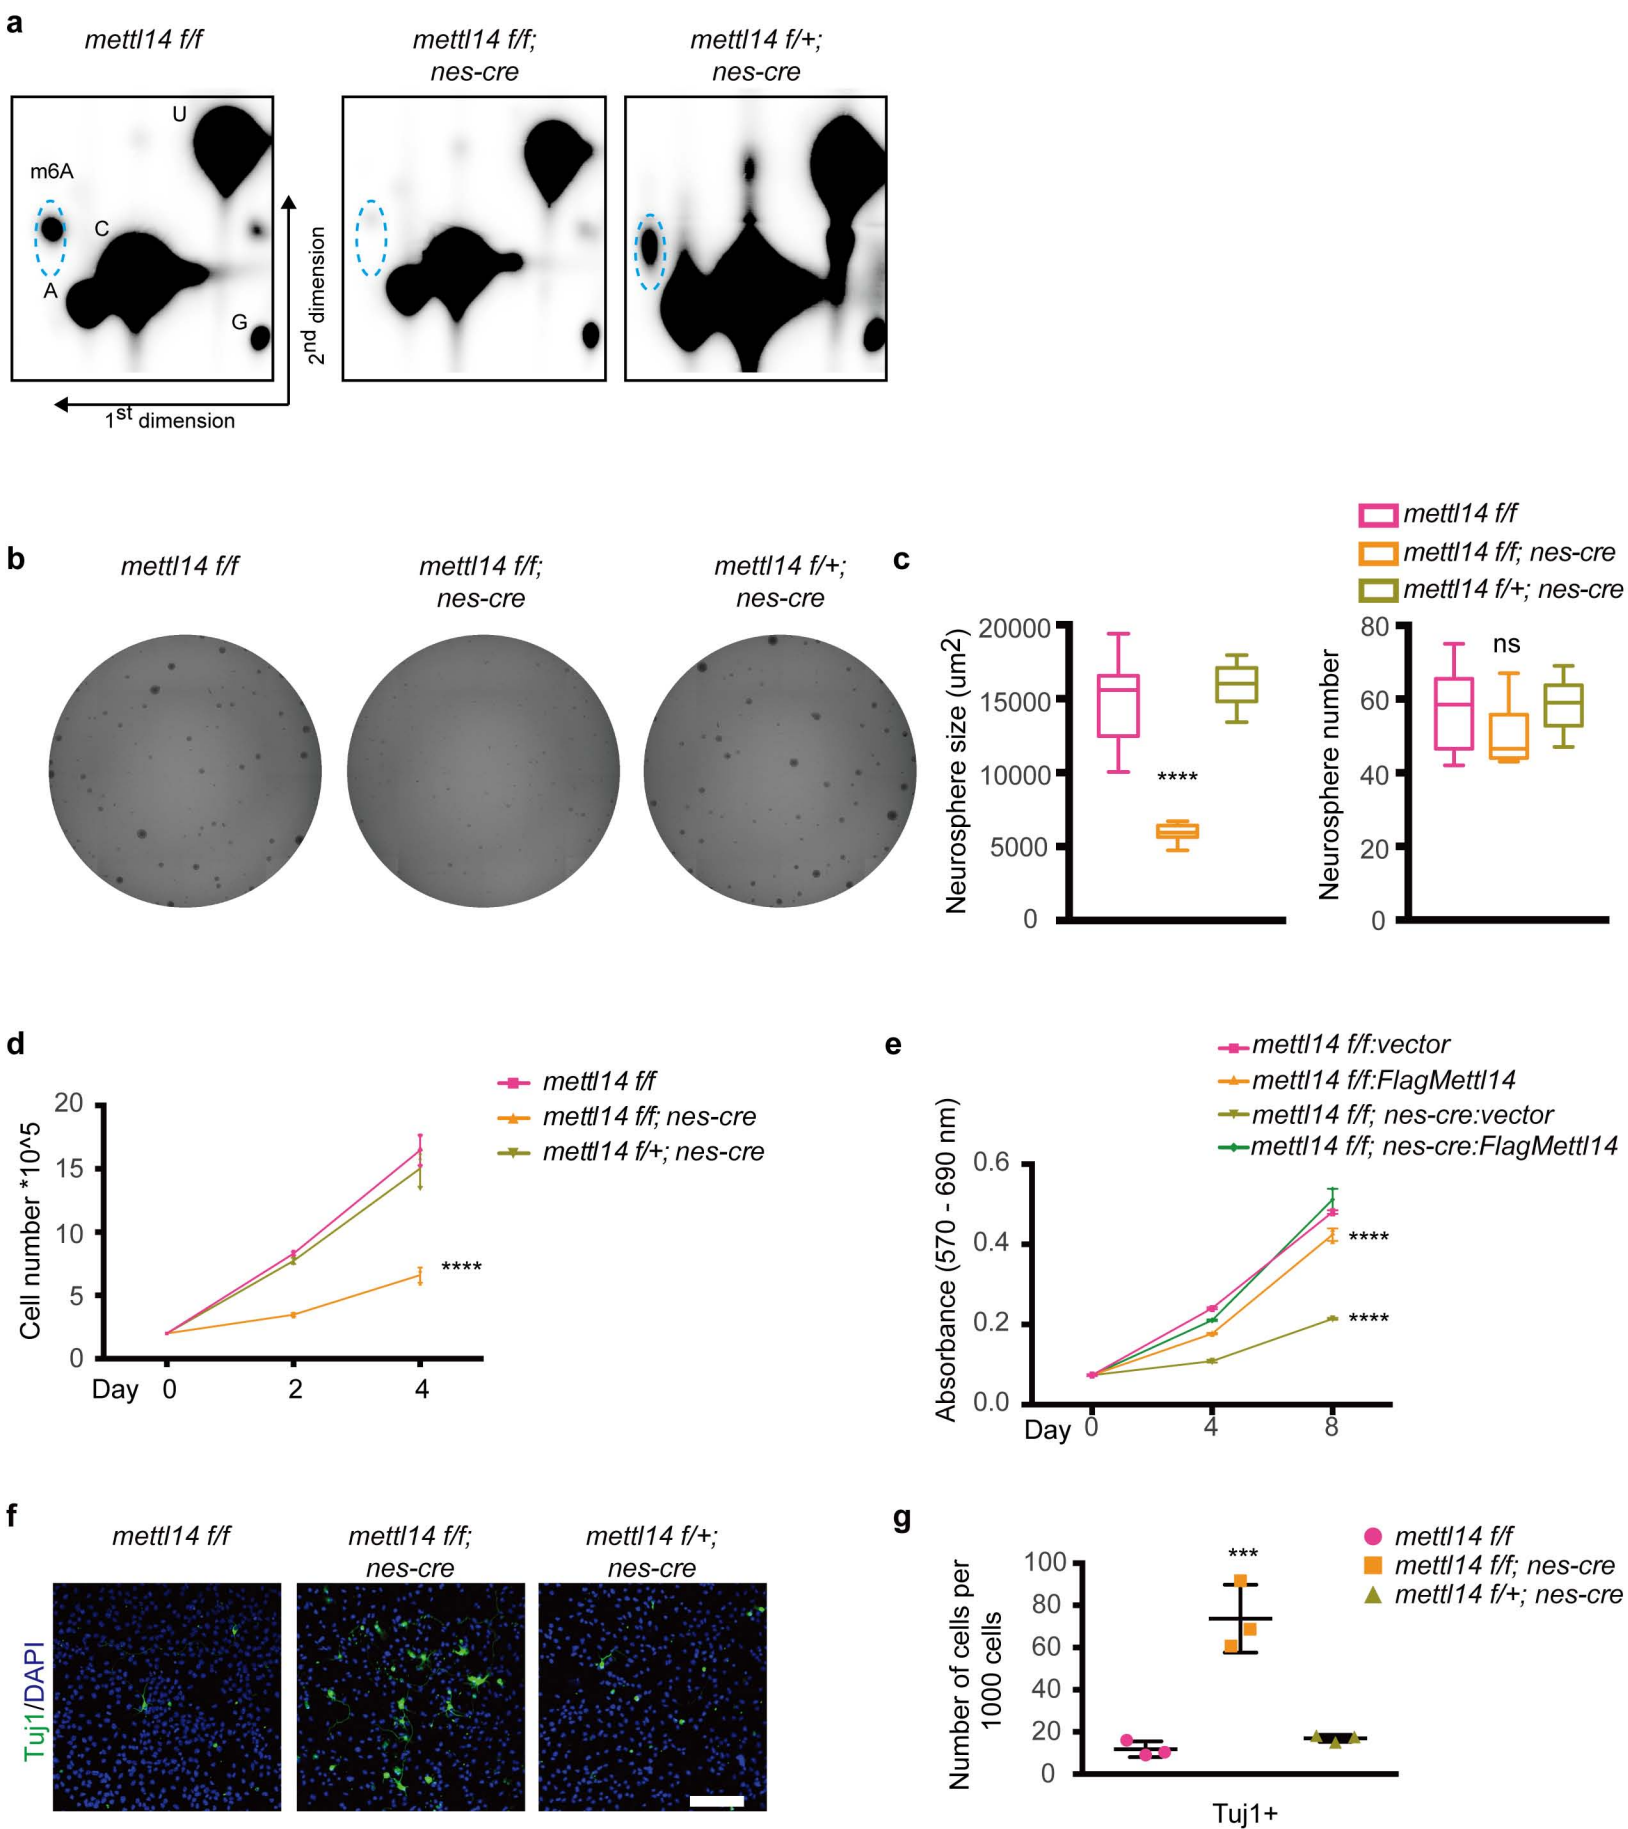

**Figure 3**

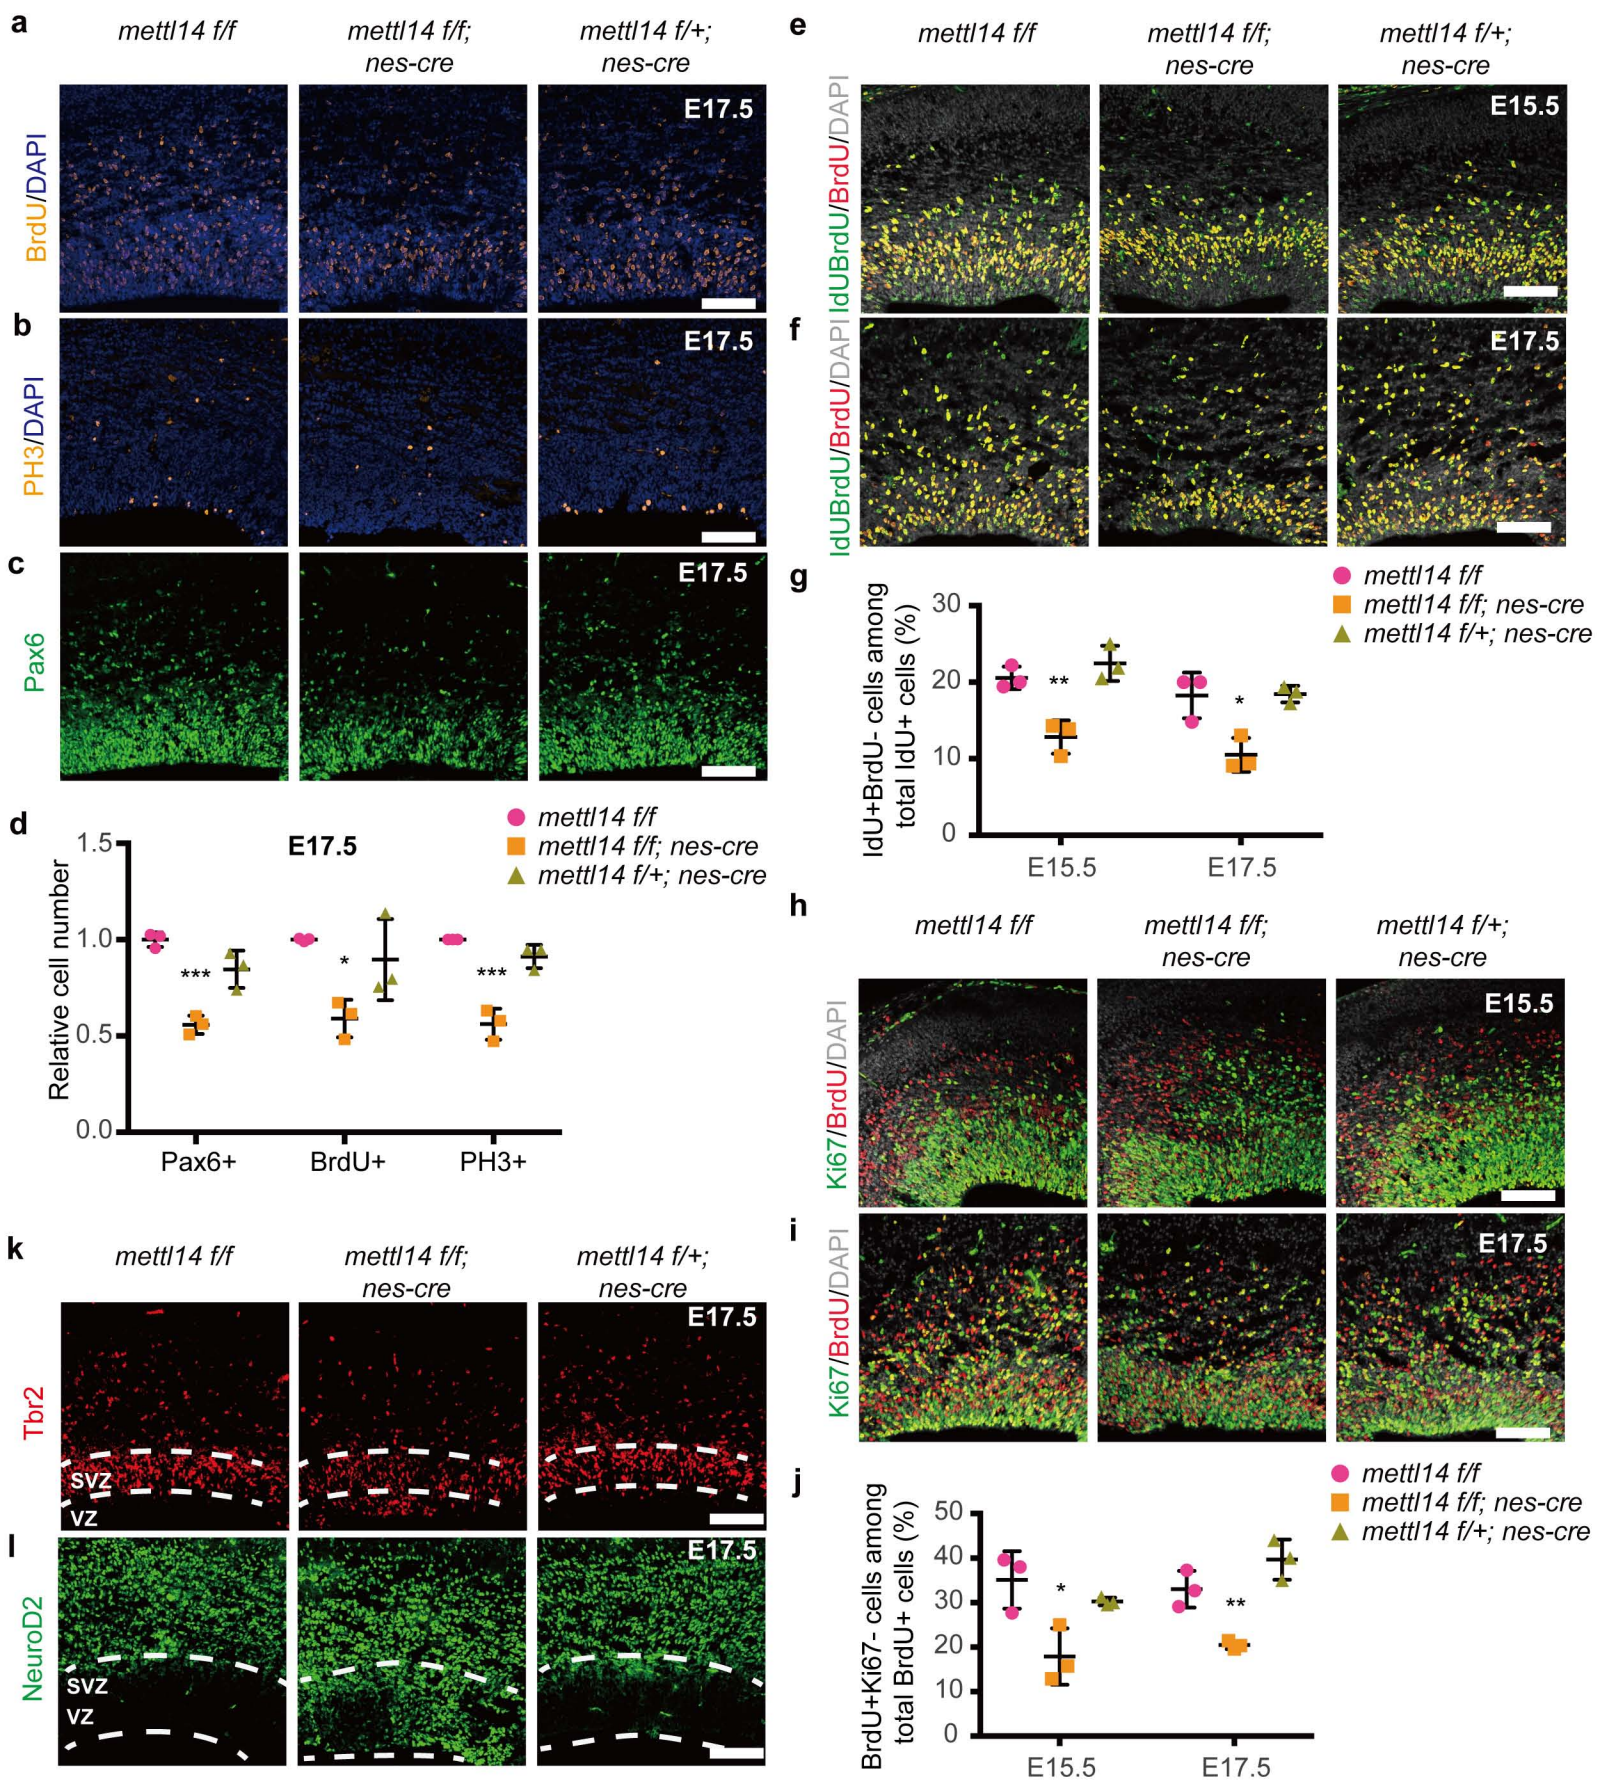

**Figure 4**

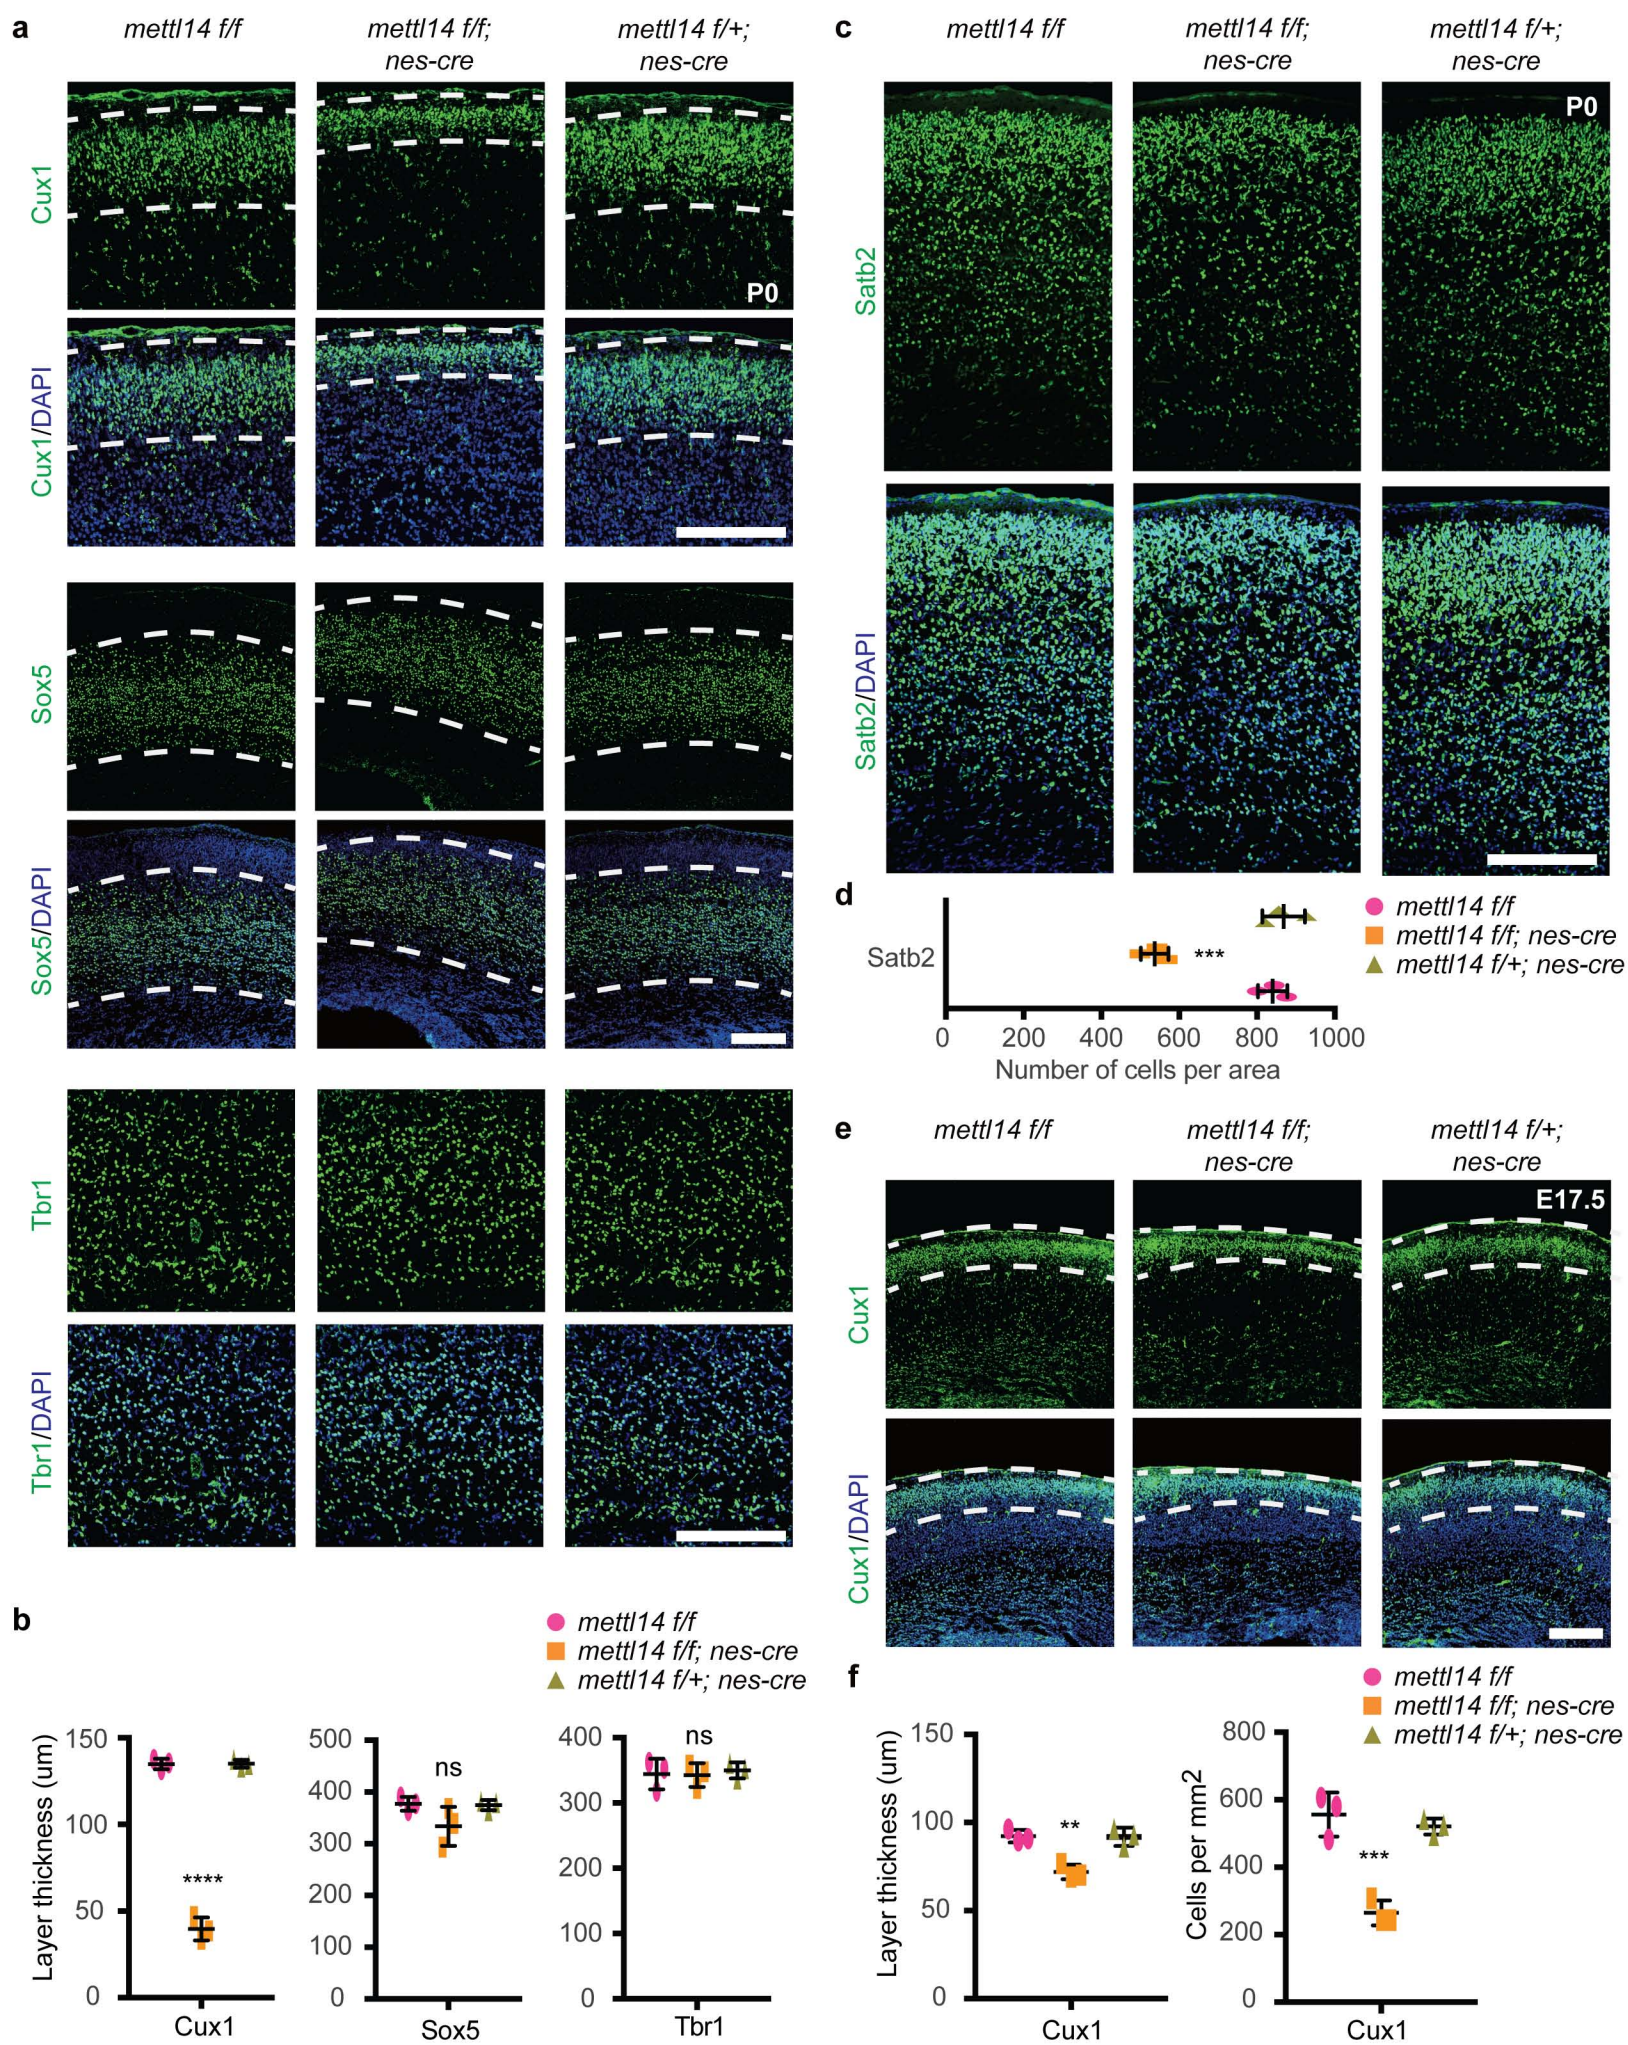

**Figure 5**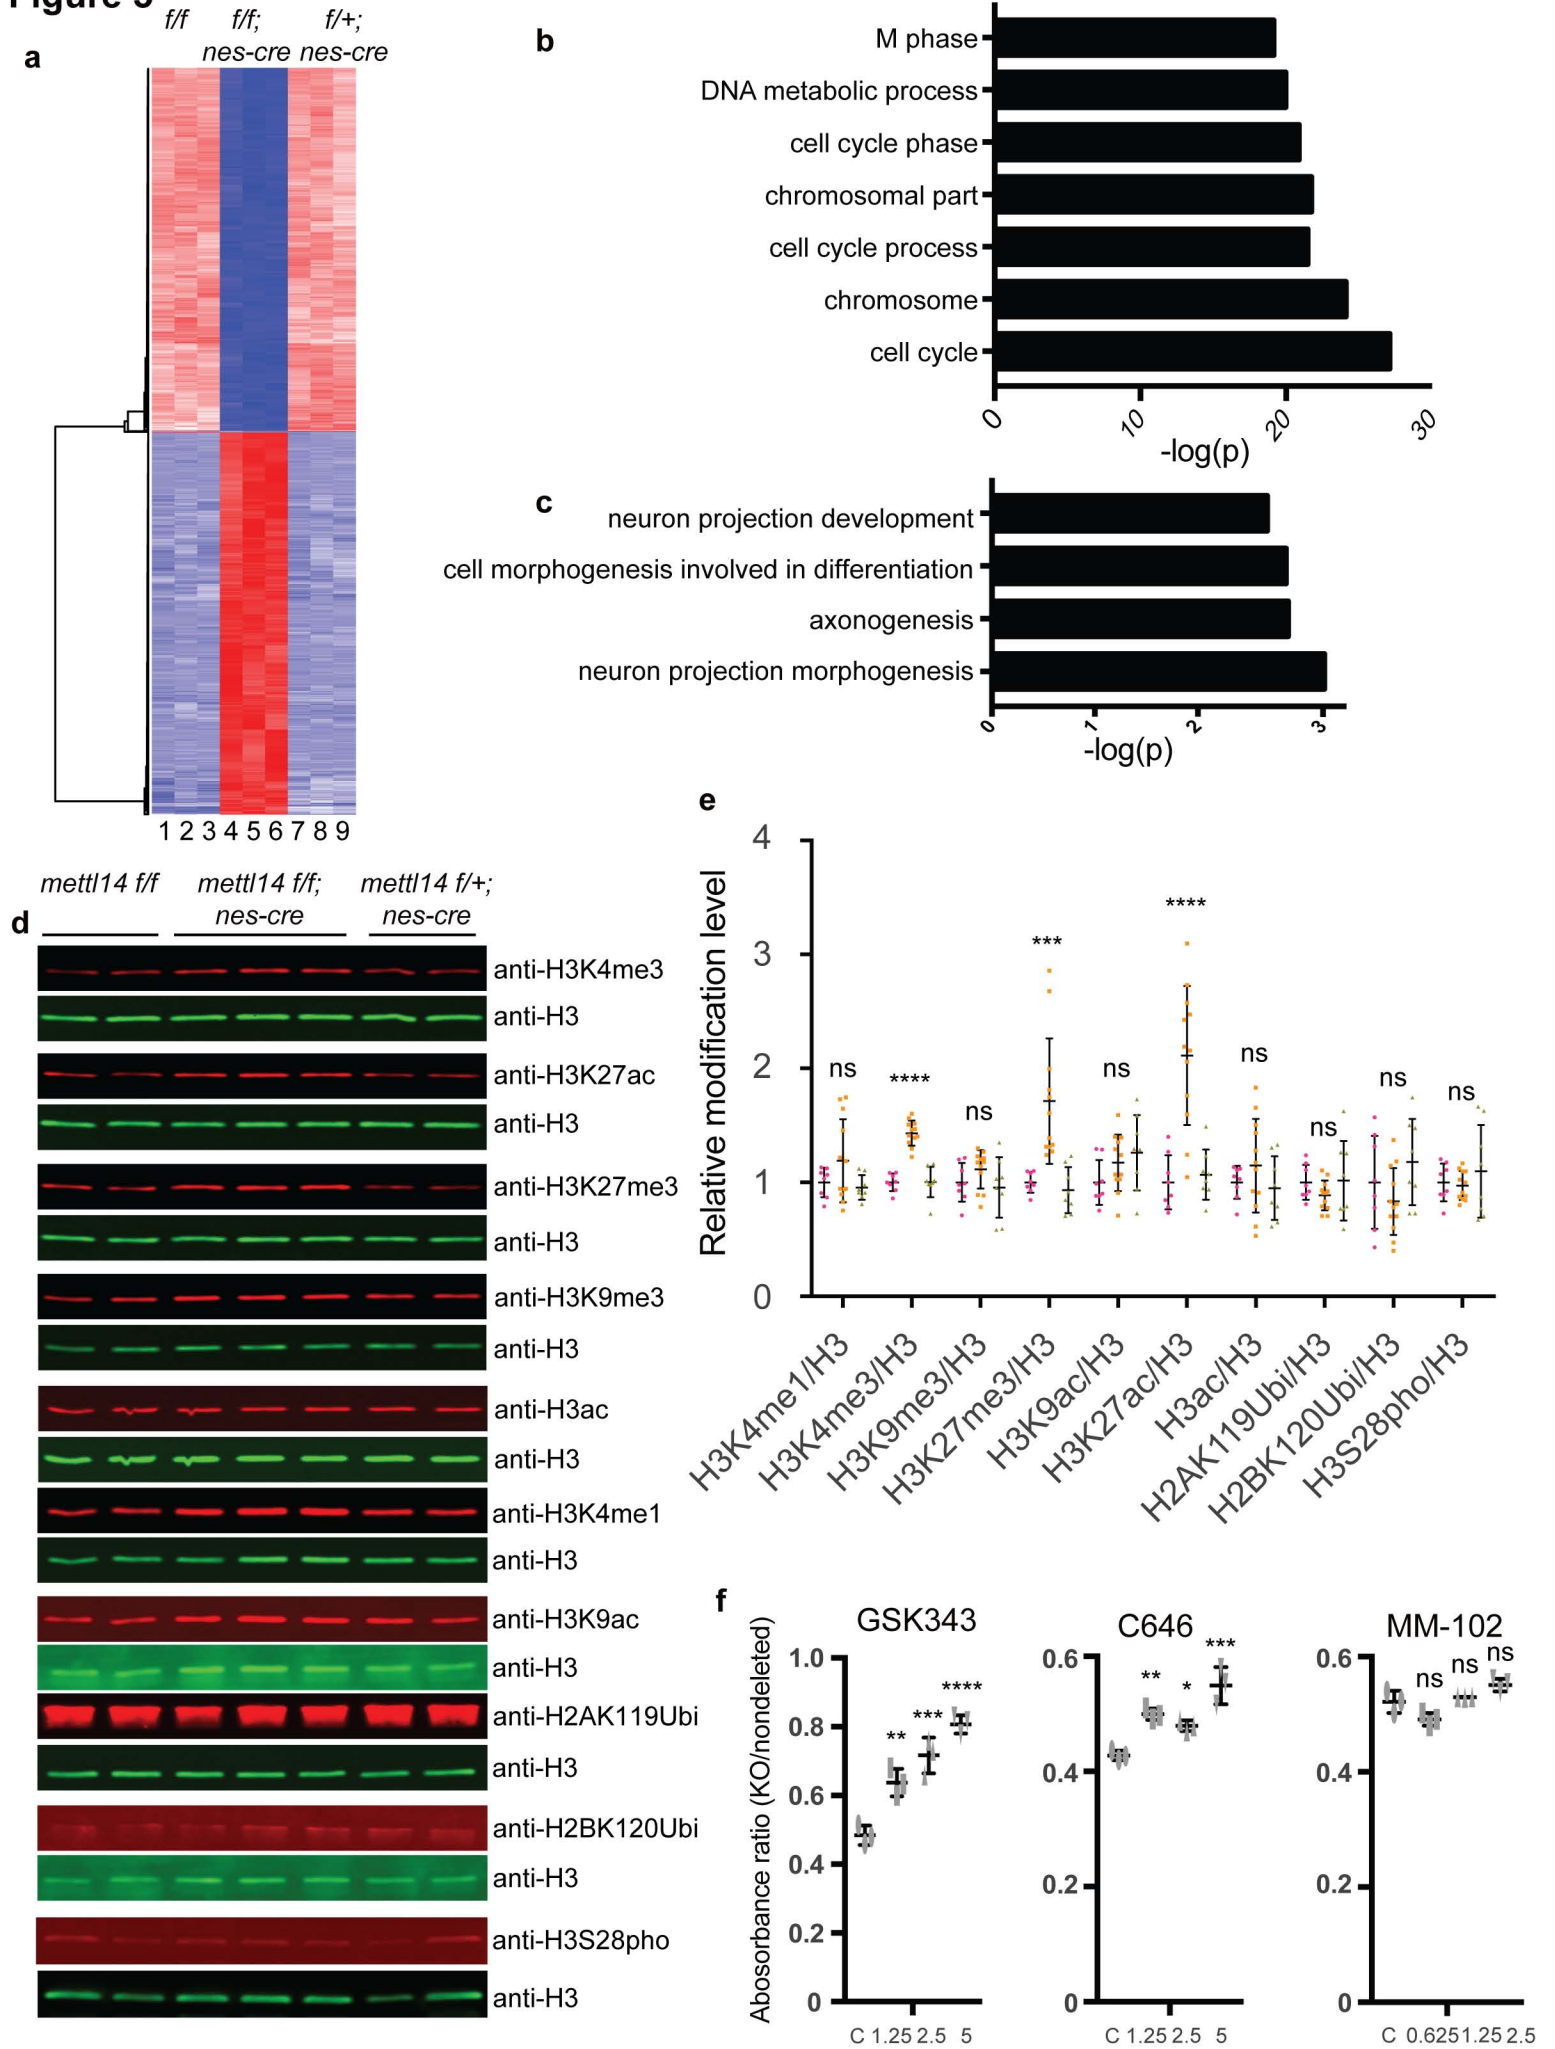

**Figure 6**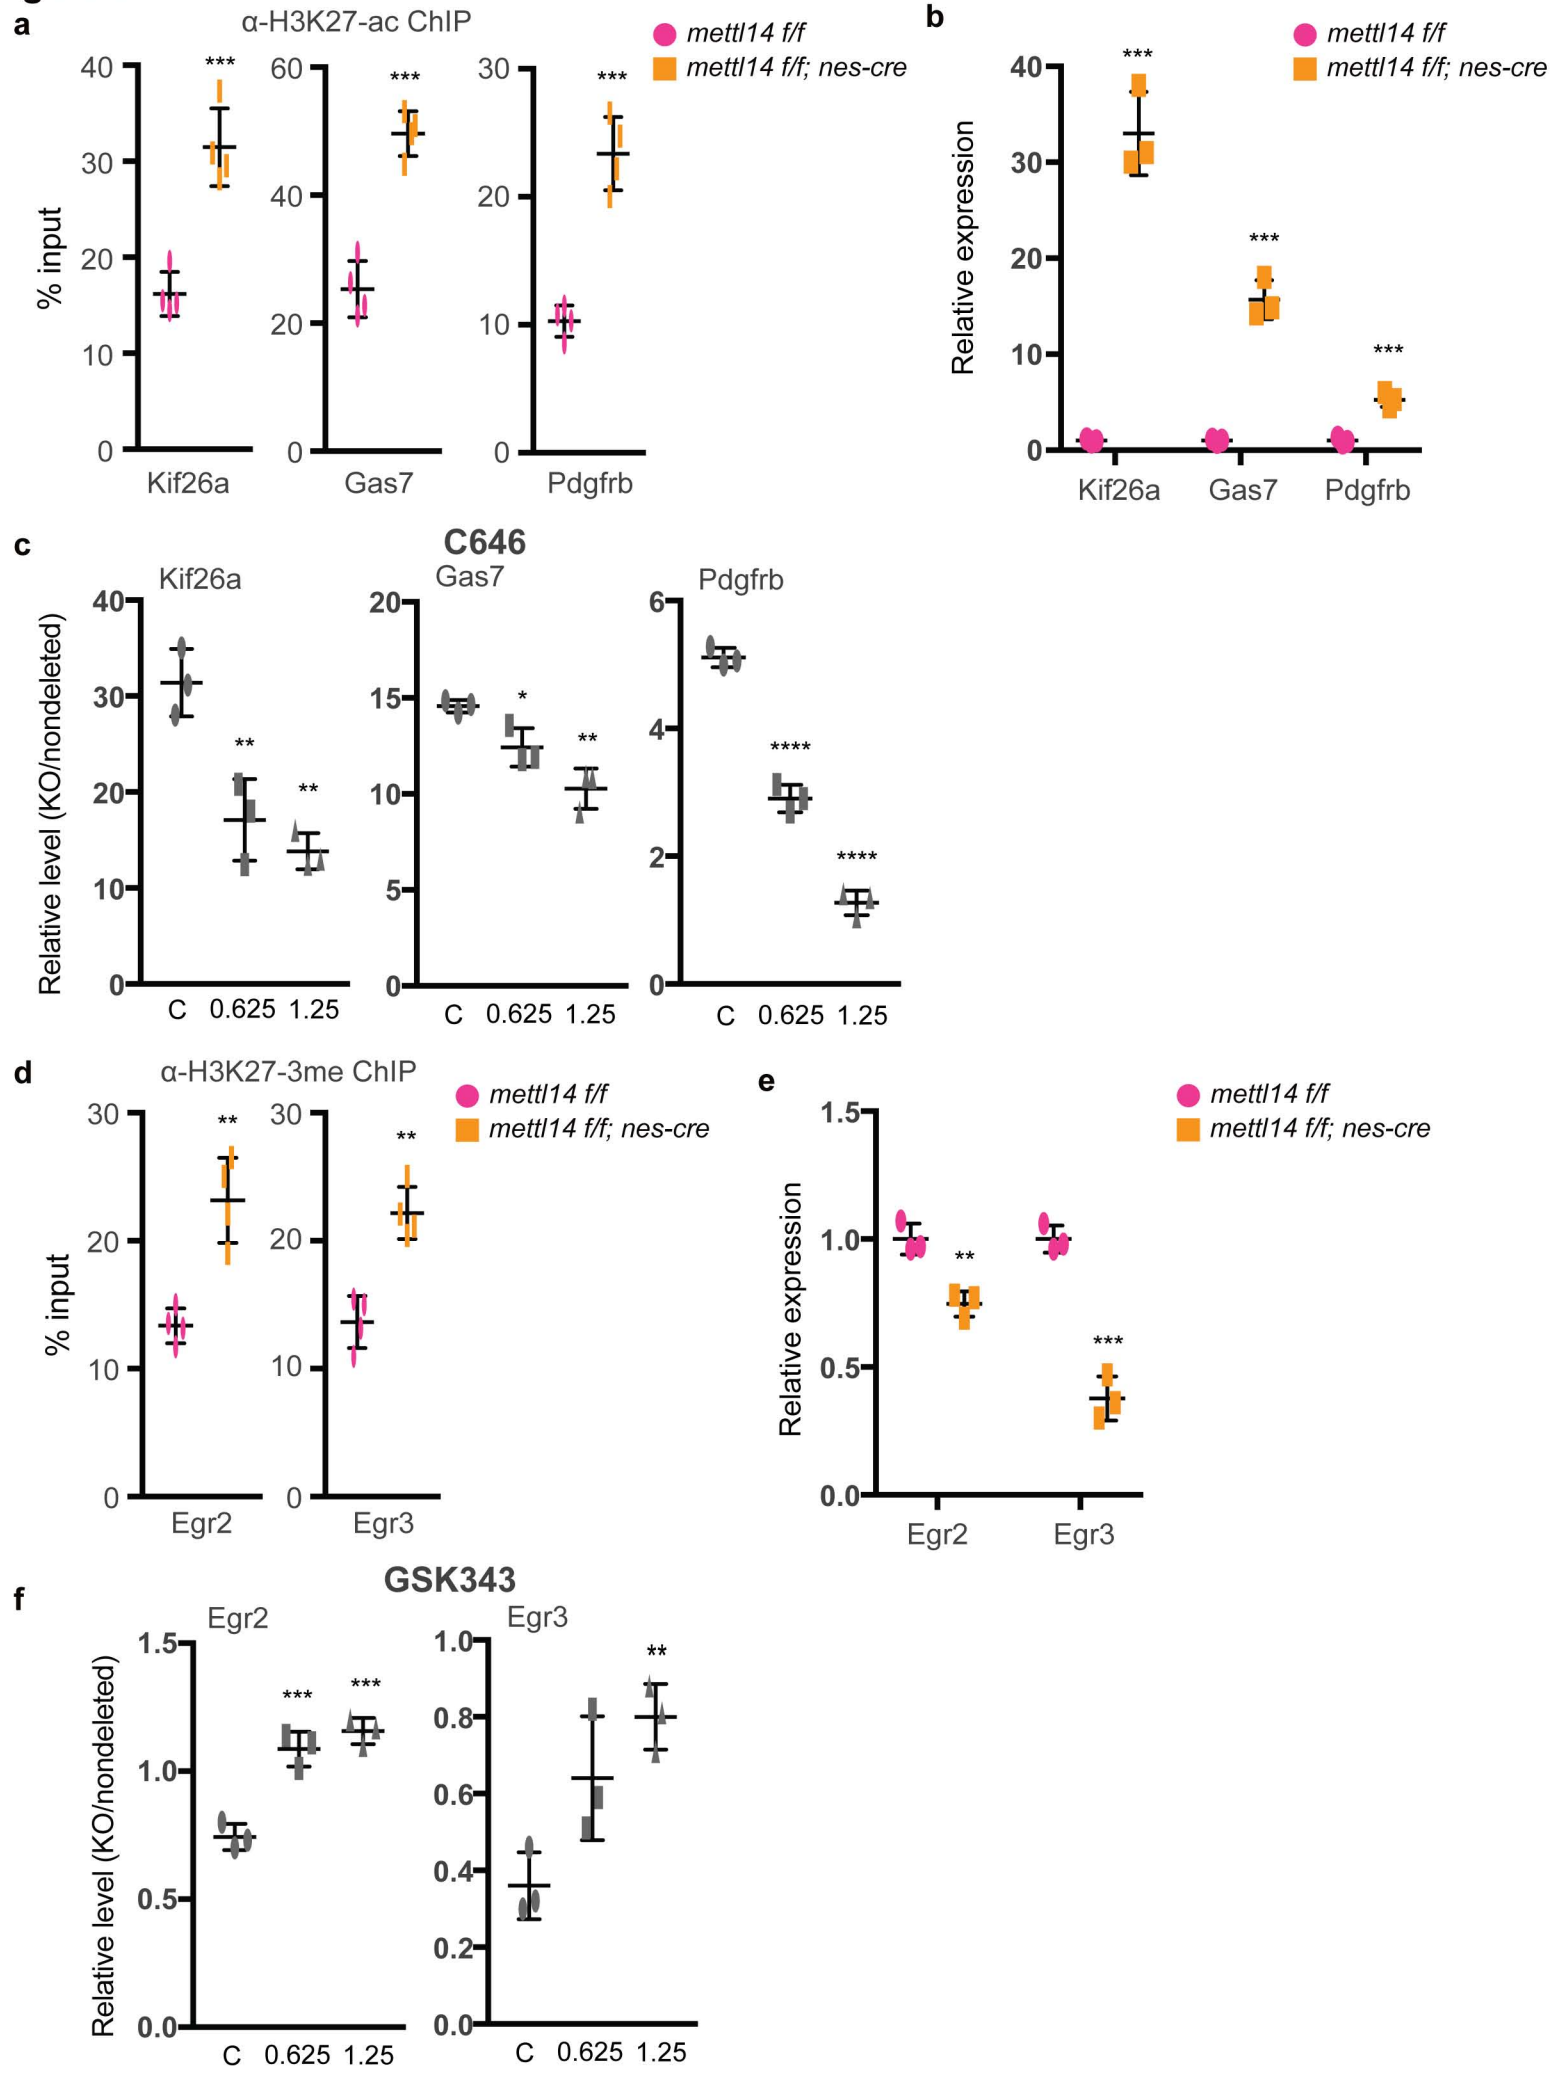

**Figure 7**

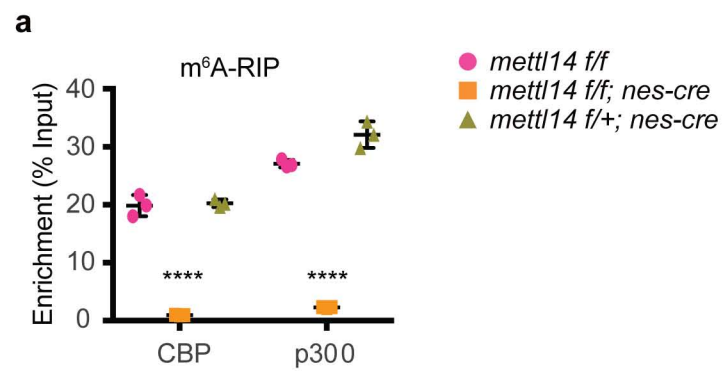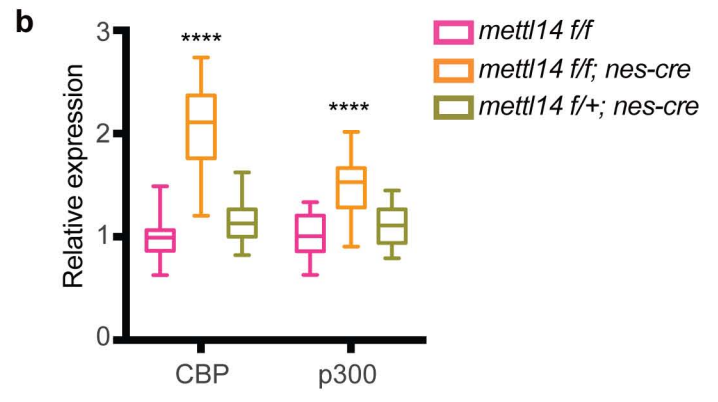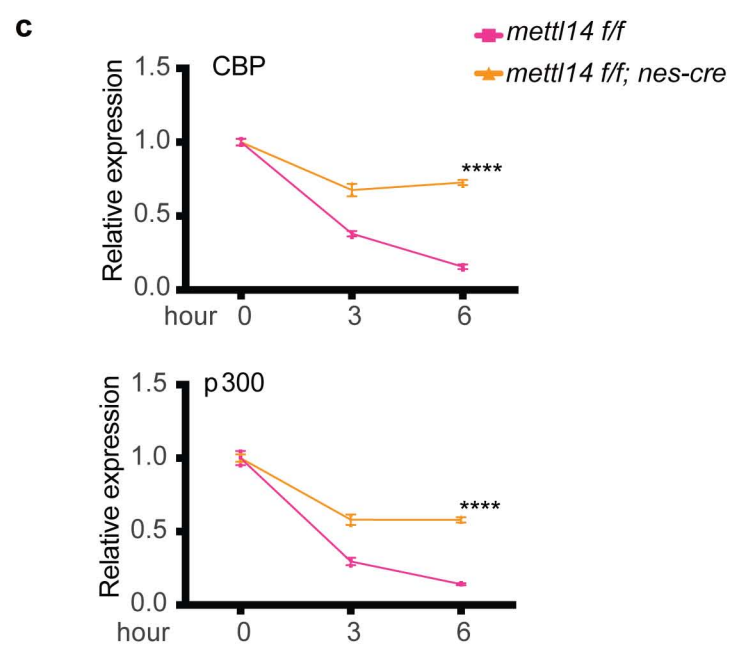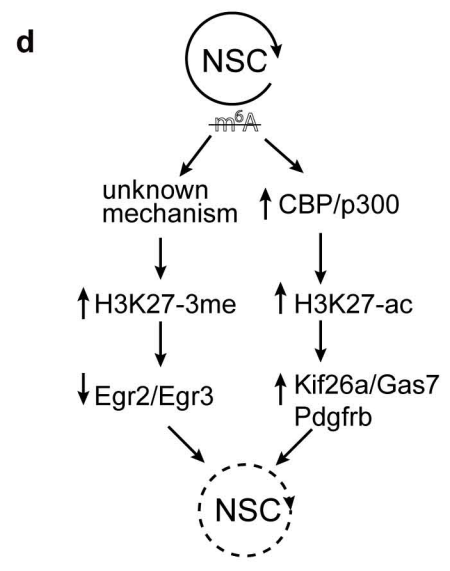

# Supplementary Figure 1

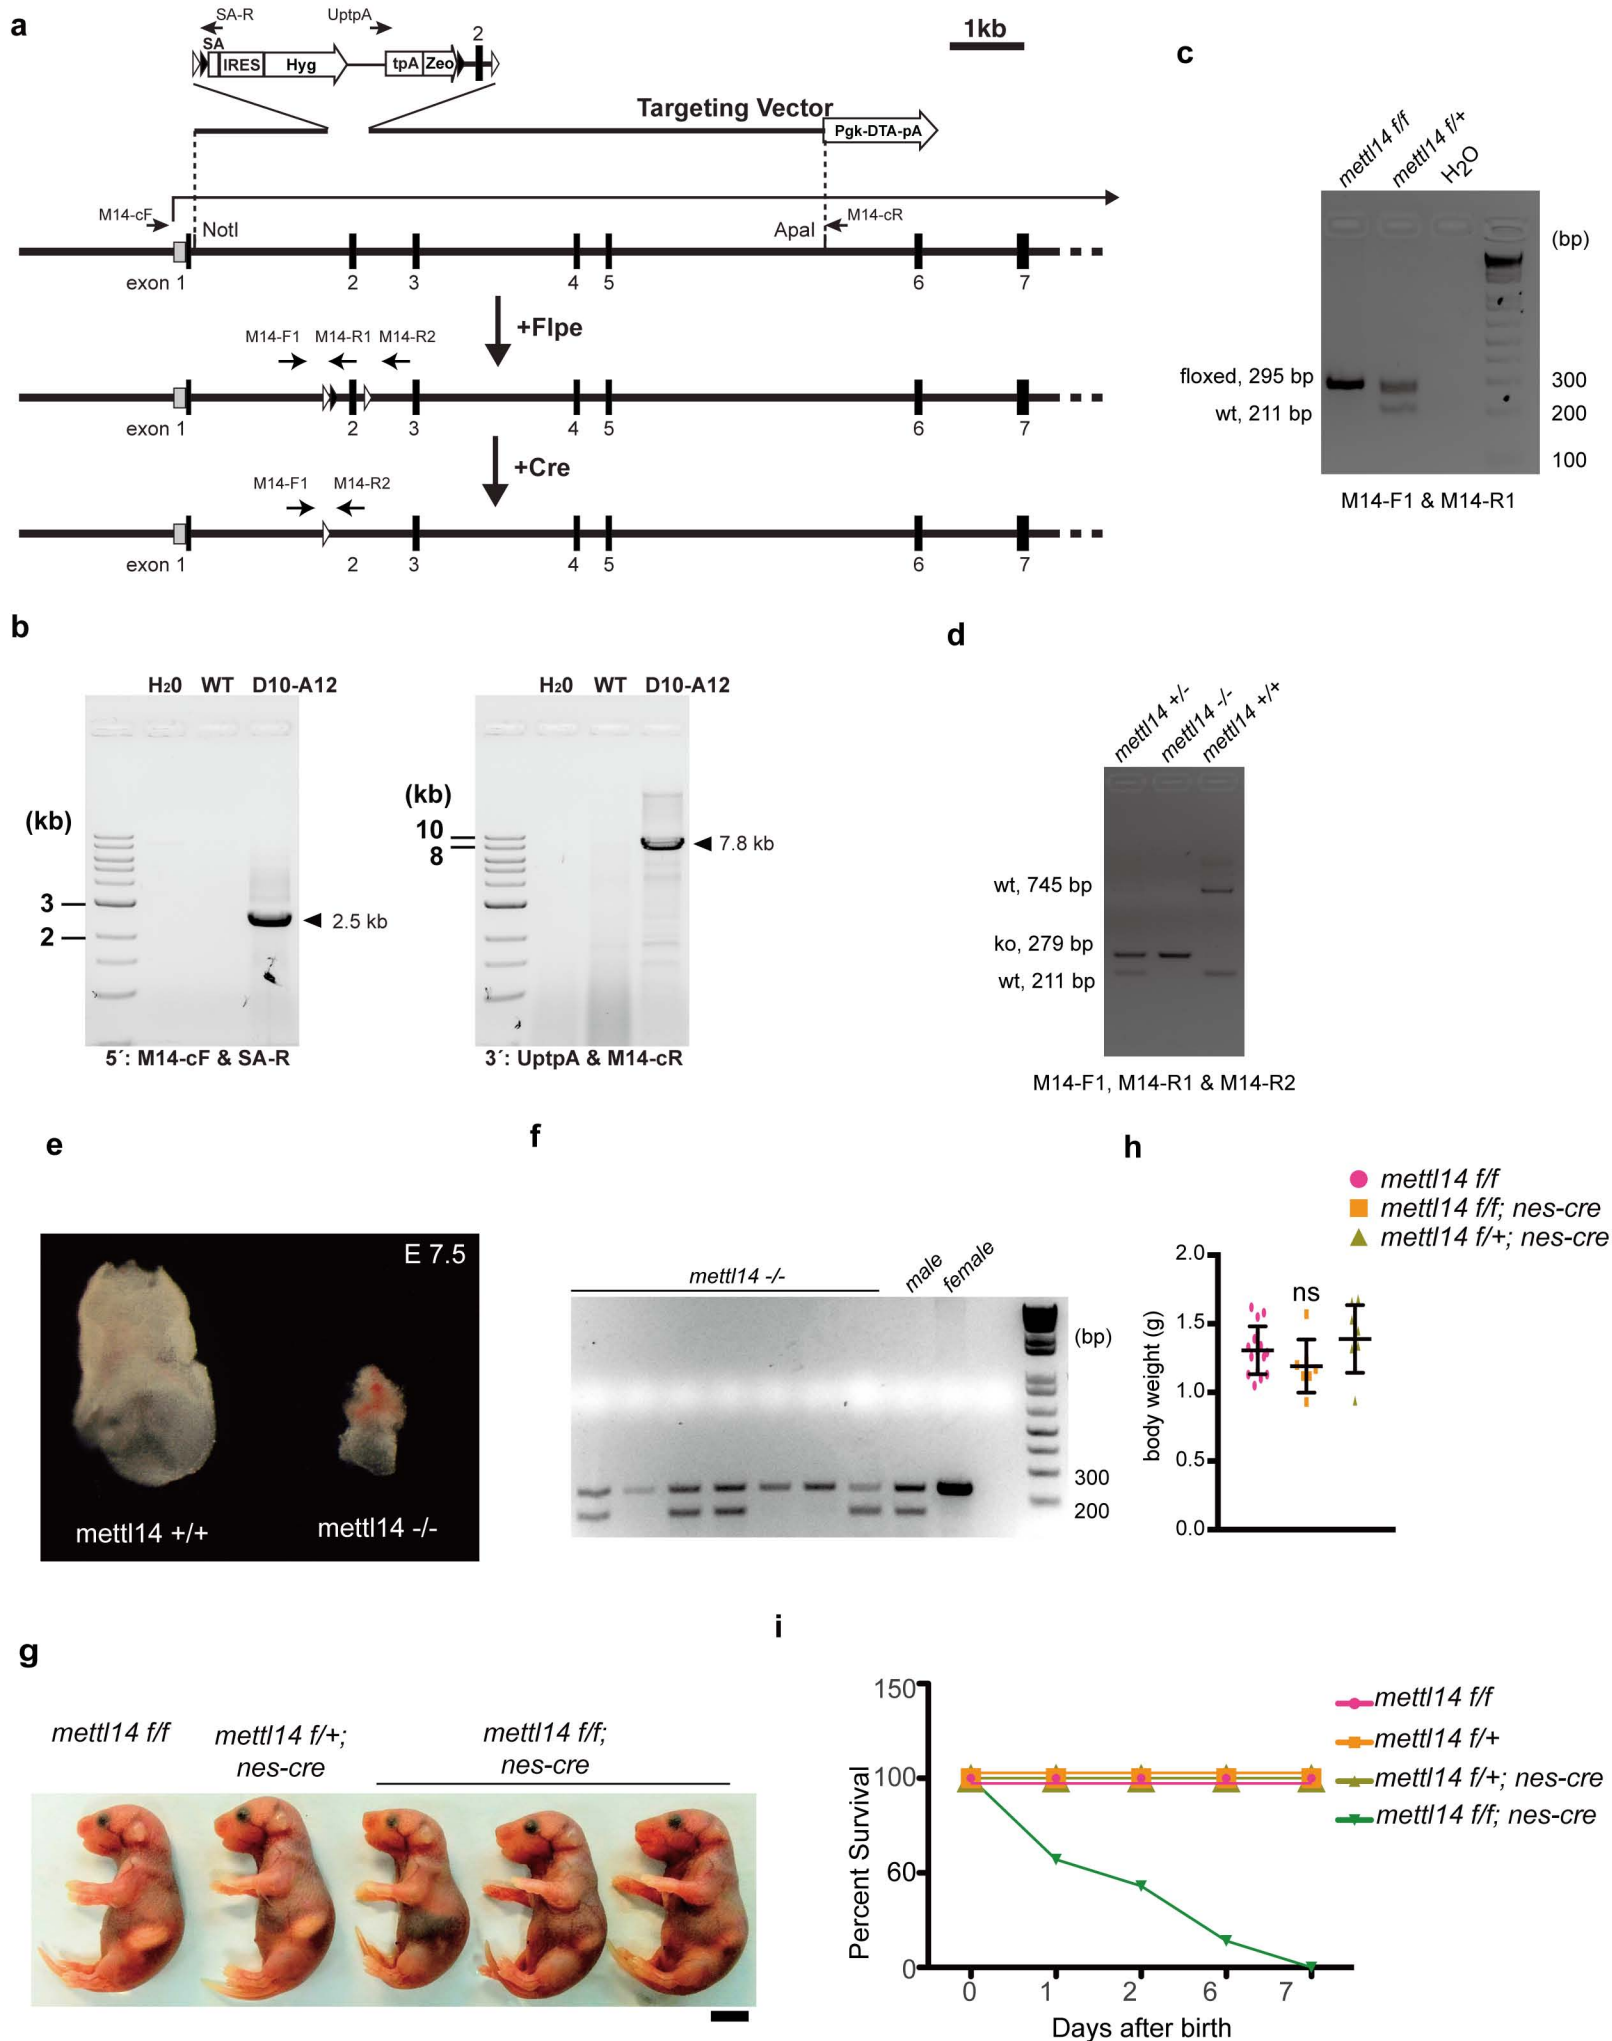



# Supplementary Figure 2

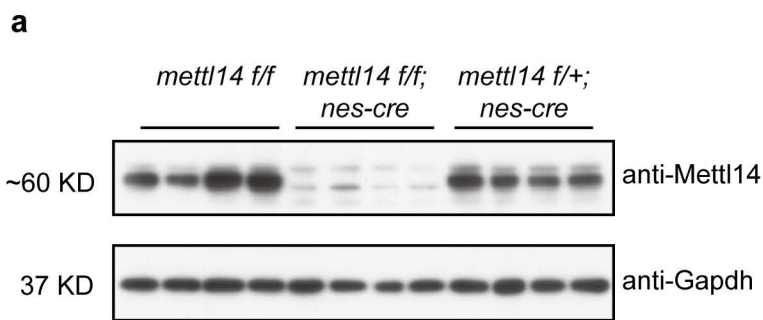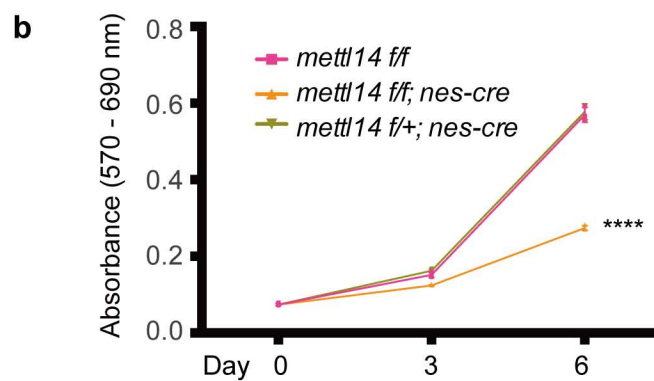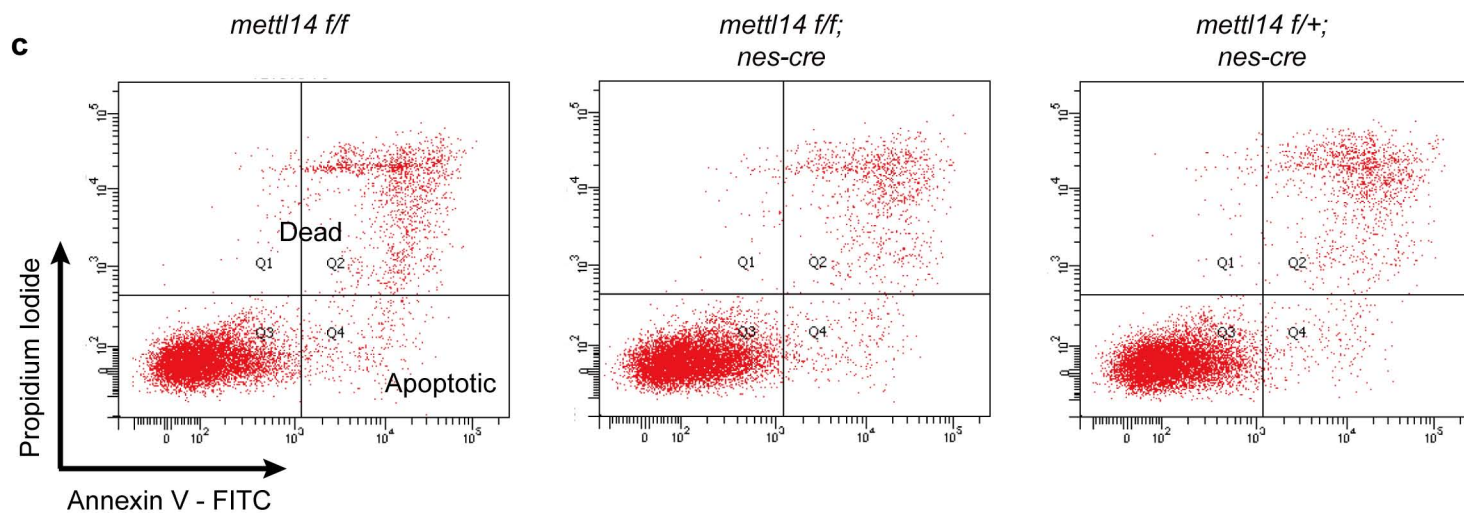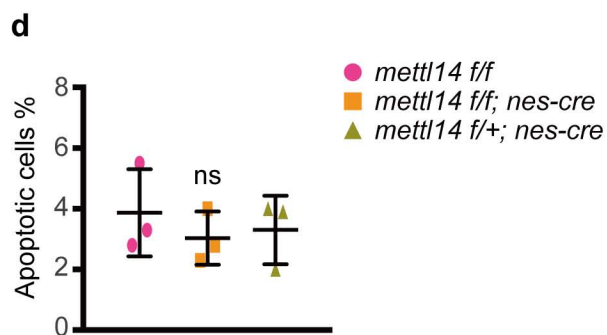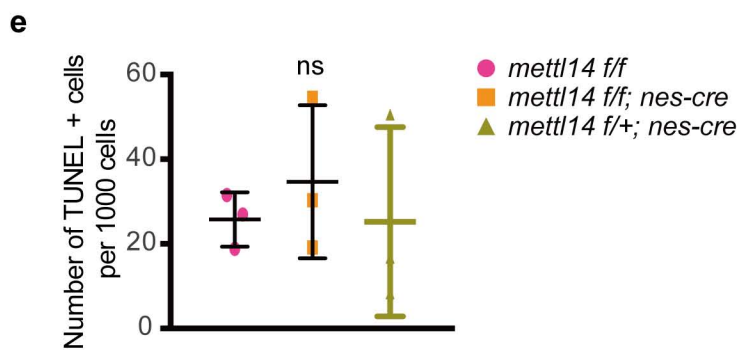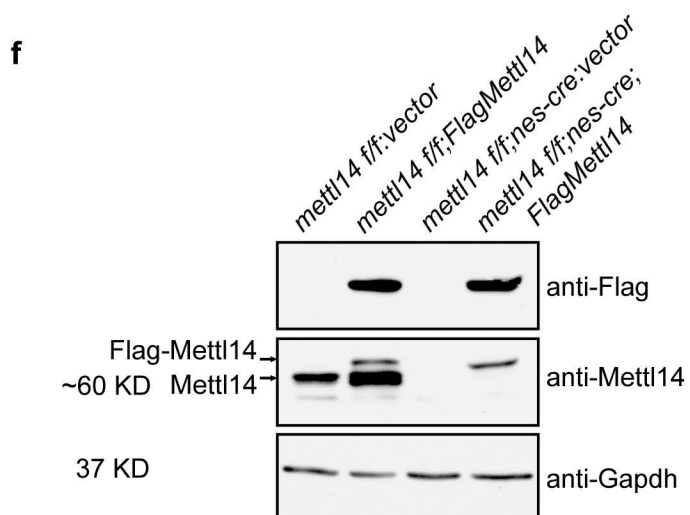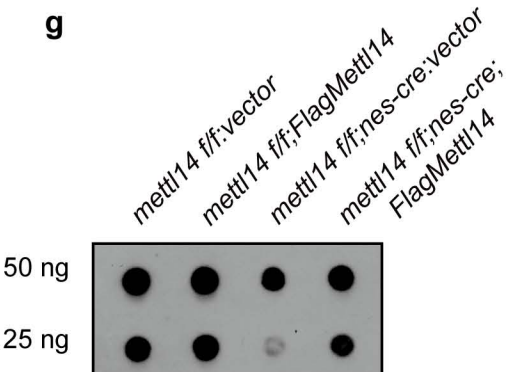

# Supplementary Figure 2

**h**

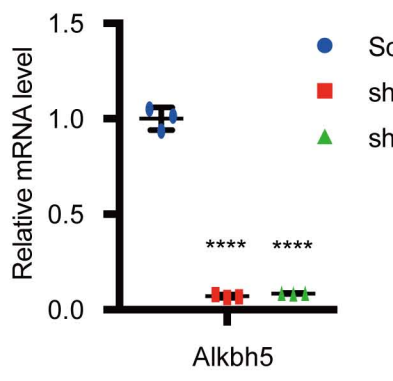

**i**

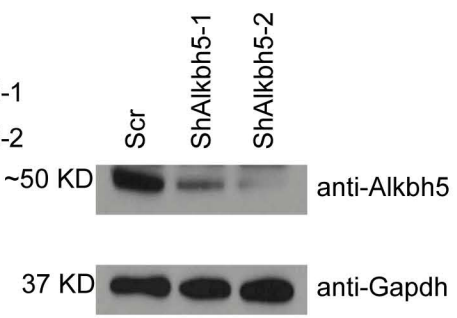

**j**

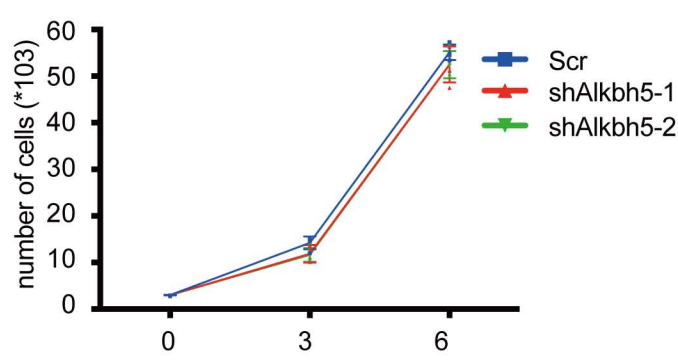

**k**

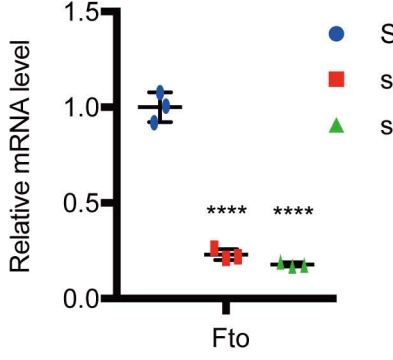

**l**

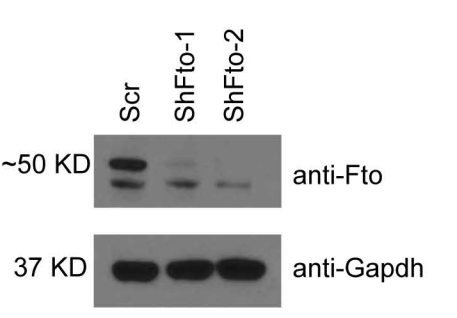

**m**

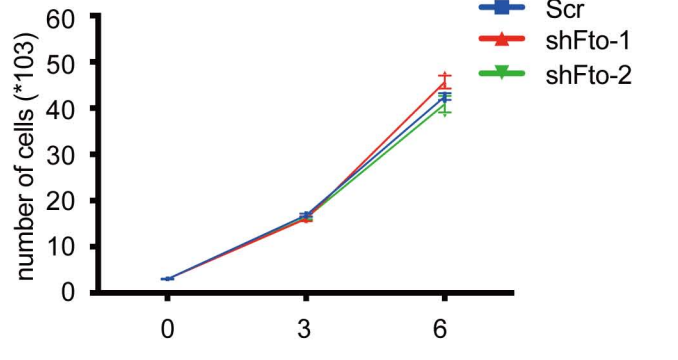

# Supplementary Figure 3

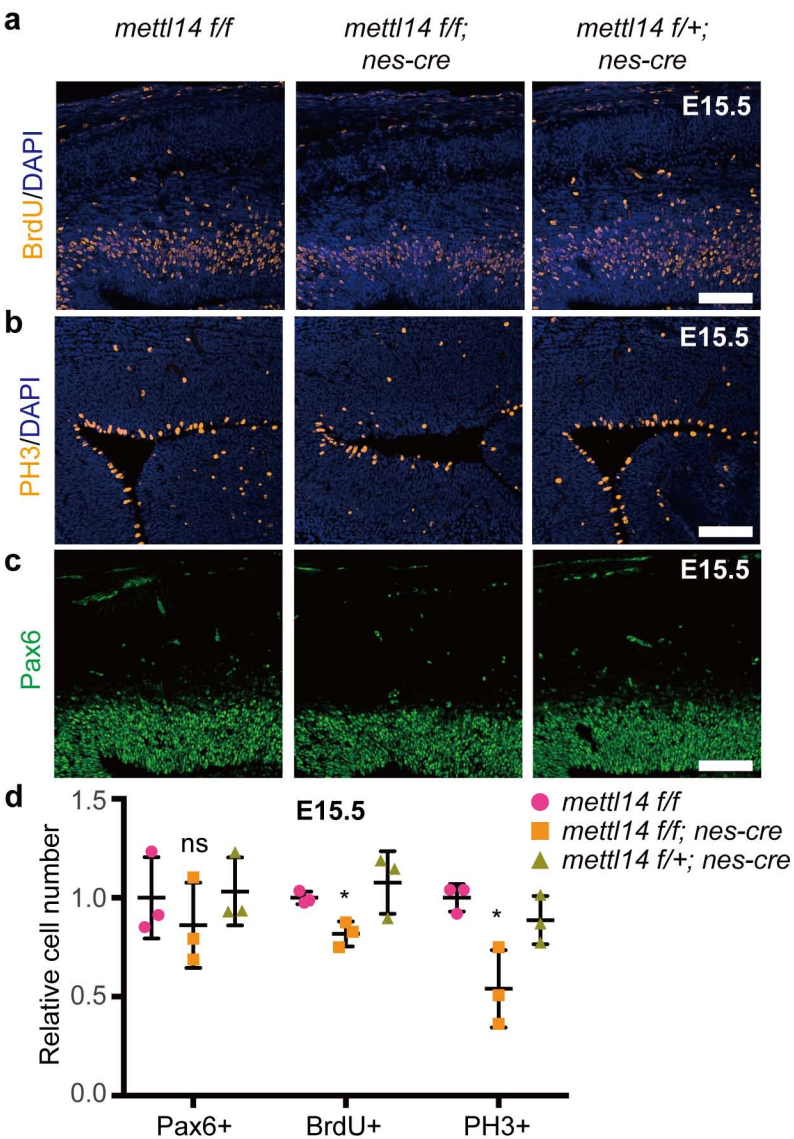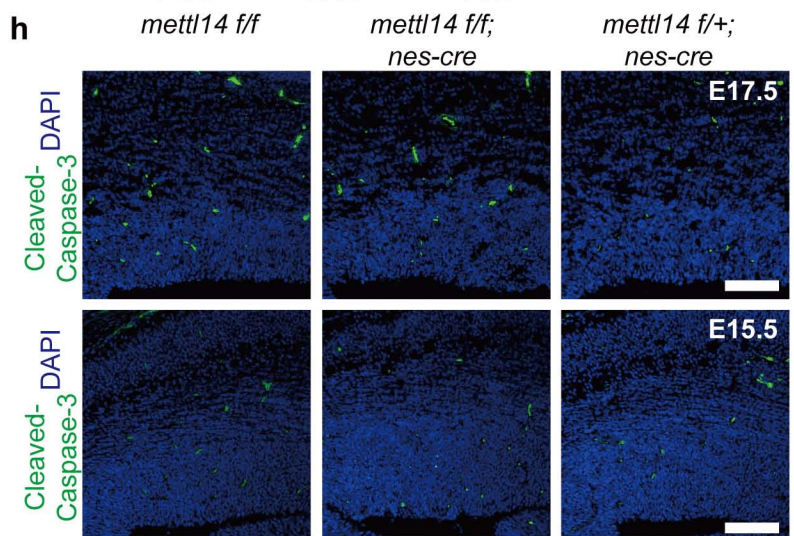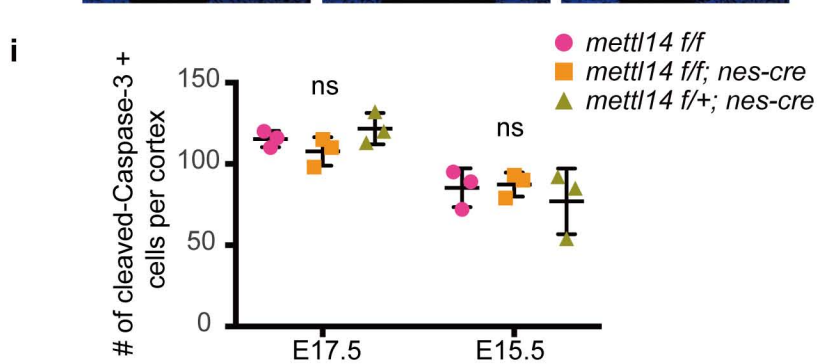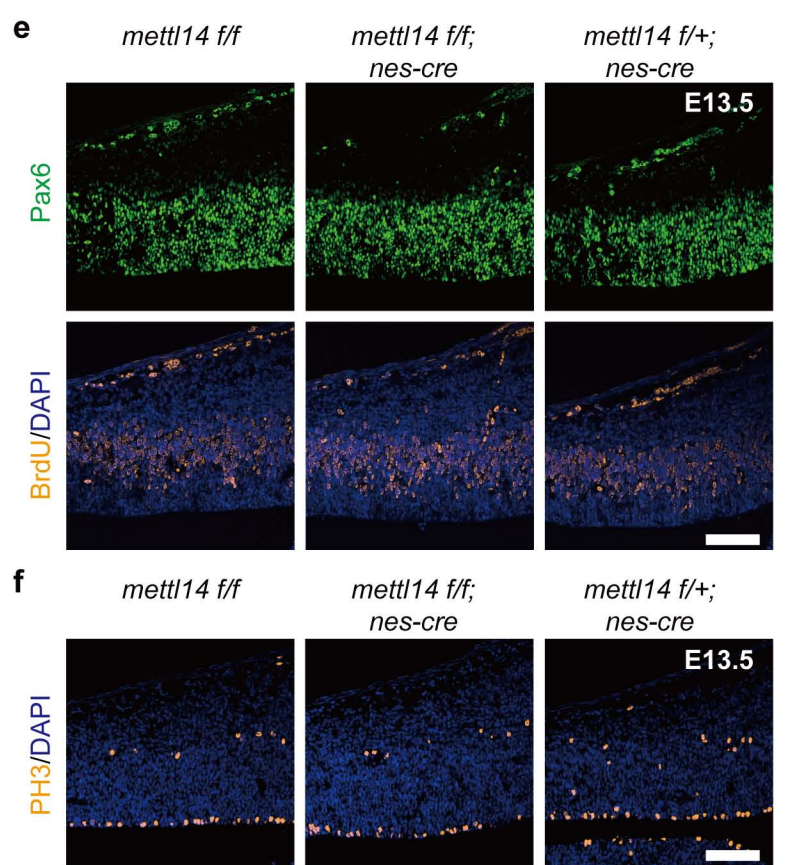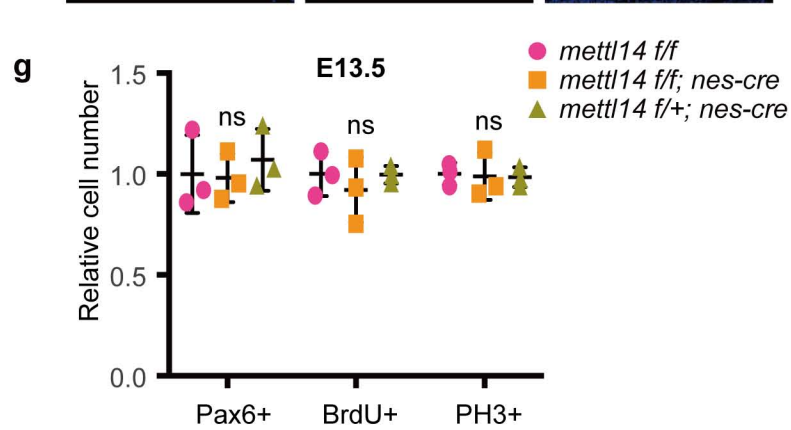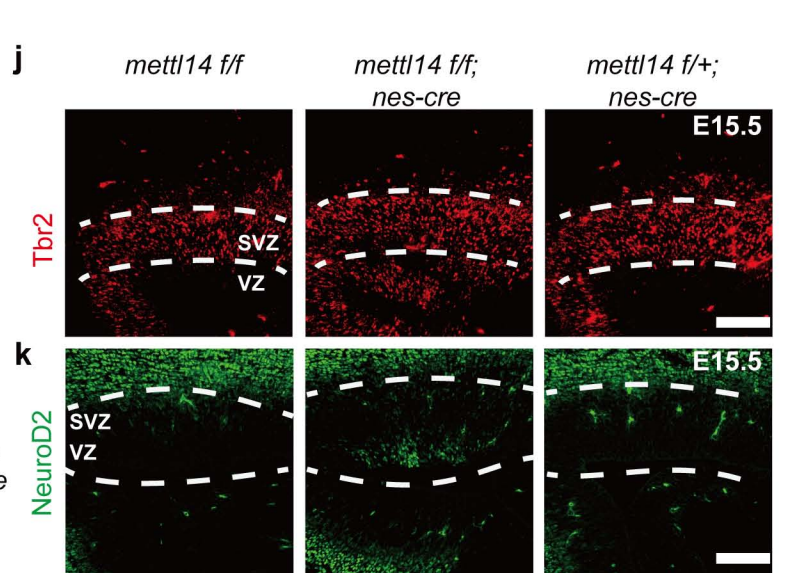

# Supplementary Figure 4

**a**

| down-regulated genes in <i>Mettl14</i> KO E14.5 NSCs |            |              |          |
|------------------------------------------------------|------------|--------------|----------|
| Gene ontology term                                   | Gene count | GO term size | P value  |
| M phase                                              | 78         | 283          | 7.34E-20 |
| DNA metabolic proces:                                | 218        | 421          | 1.11E-20 |
| cell cycle phase                                     | 212        | 328          | 1.31E-21 |
| chromosomal part                                     | 163        | 318          | 1.86E-22 |
| cell cycle process                                   | 176        | 393          | 3.36E-22 |
| chromosome                                           | 98         | 378          | 7.96E-25 |
| cell cycle                                           | 140        | 611          | 8.24E-28 |

| up-regulated genes in <i>Mettl14</i> KO E14.5 NSCs |            |              |          |
|----------------------------------------------------|------------|--------------|----------|
| Gene ontology term                                 | Gene count | GO term size | P value  |
| neuron projection development                      | 29         | 218          | 2.12E-03 |
| cell morphogenesis involved in differentiati       | 29         | 212          | 1.39E-03 |
| axonogenesis                                       | 25         | 163          | 1.33E-03 |
| neuron projection morphogenesis                    | 27         | 176          | 5.90E-04 |

**b**

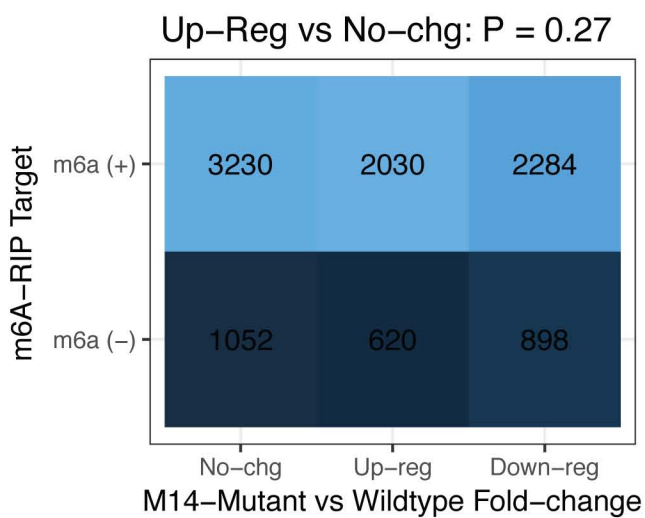

**c**

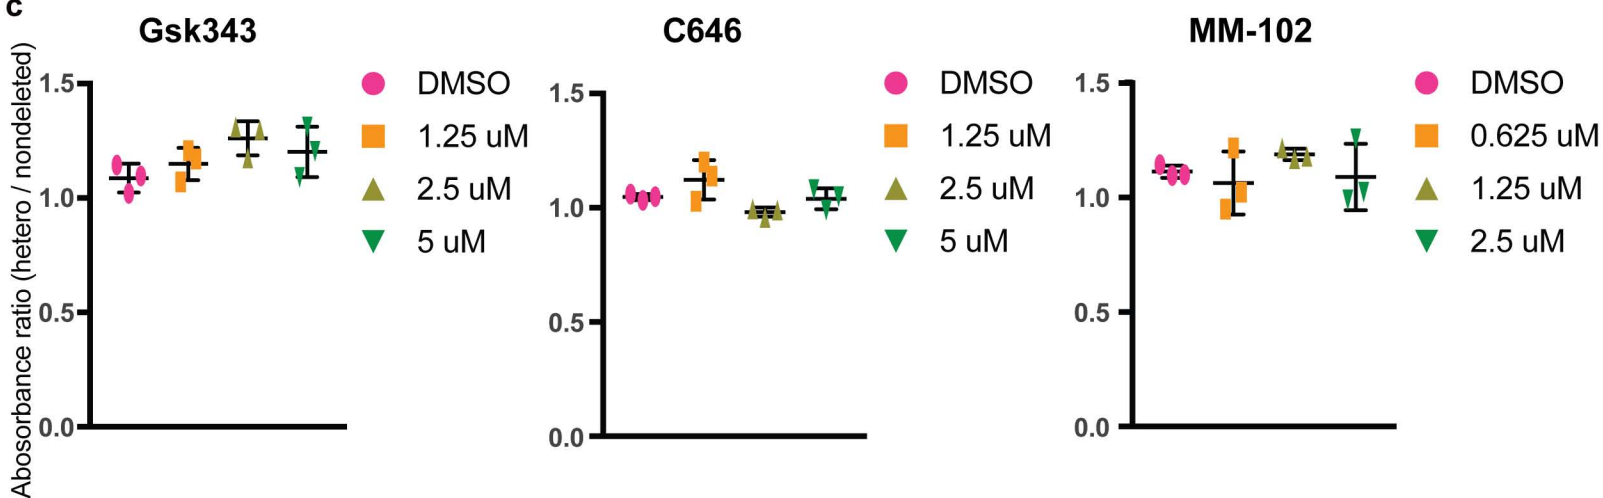

Supplementary Figure 5

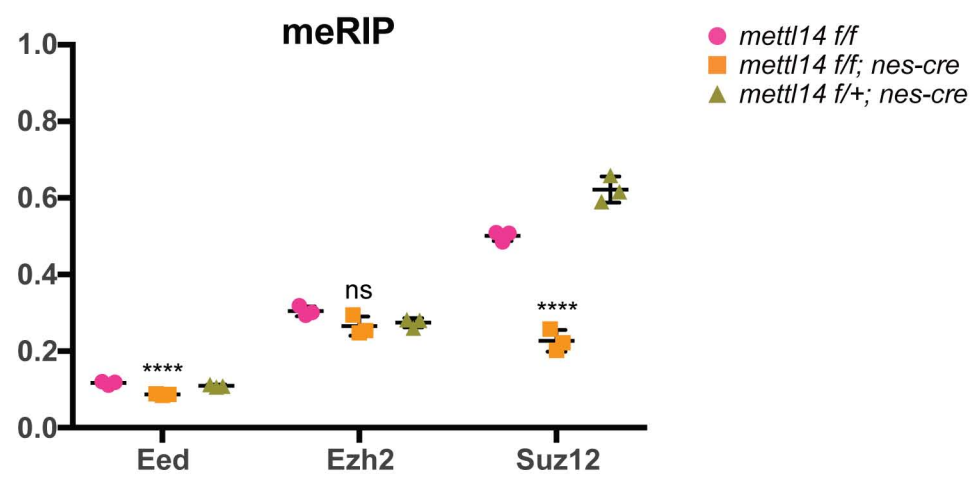

# Supplementary Figure 6

**a**

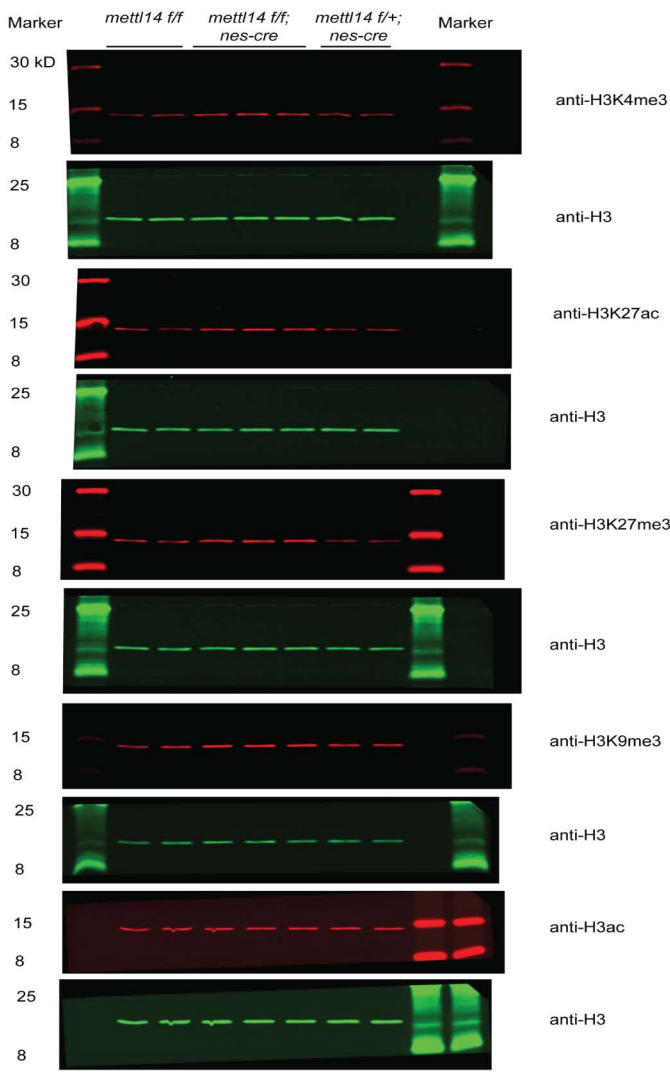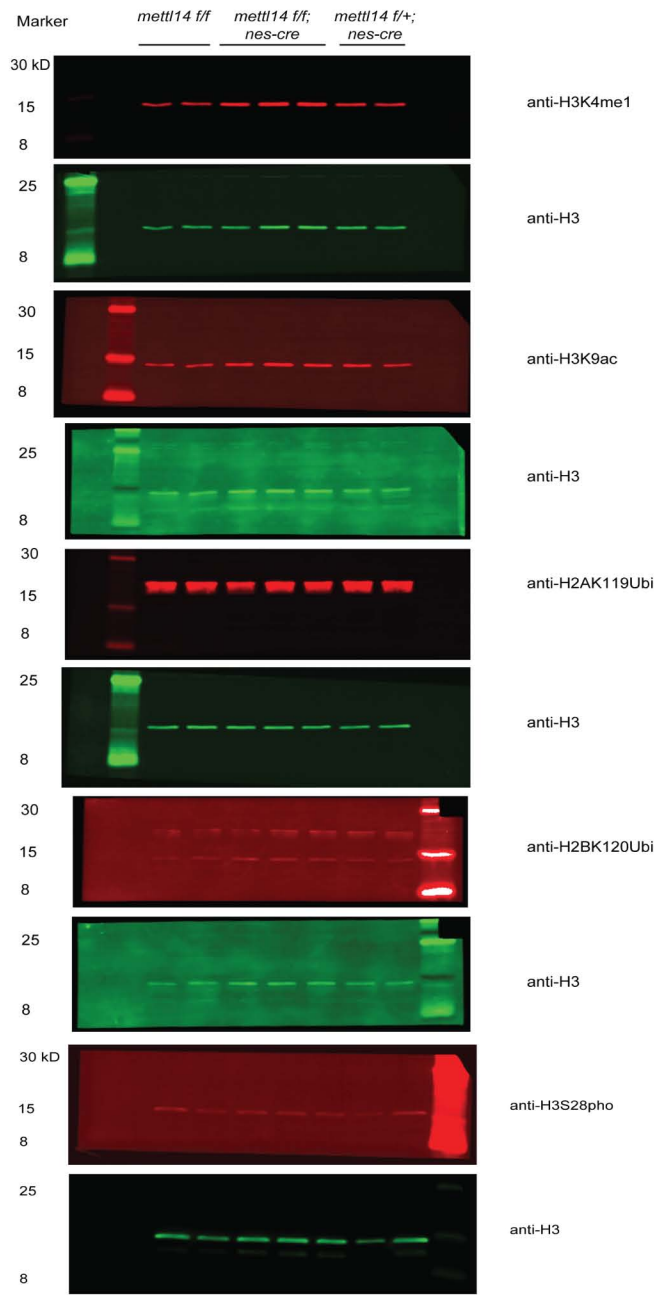

**b**

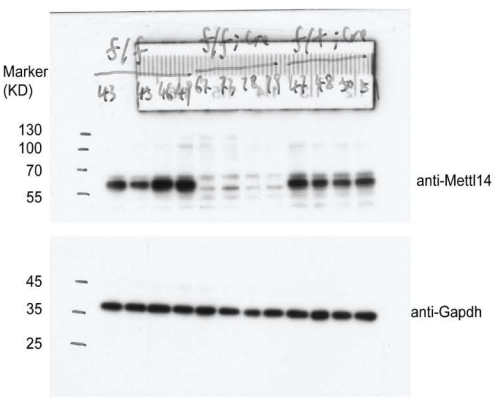

**c**

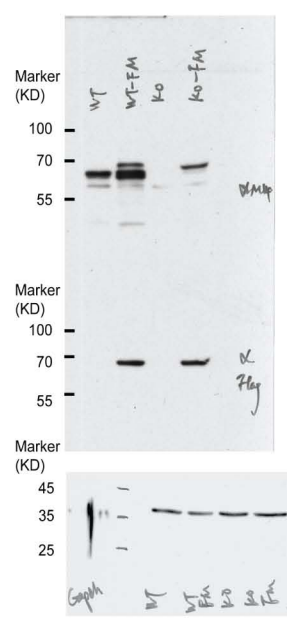

**e**

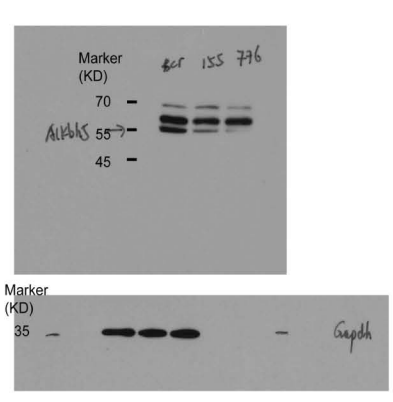

**f**

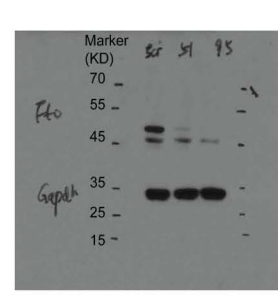

Supplement: NIHMS1000004-supplement-Figures.pdf [file NIHMS1000004-supplement-Figures.pdf]
